# Supplementary material
Source: PubMed Central journal article supplement (PMC4100979)
Supplement: NIHMS597348-supplement-Supporting_Information.pdf [file NIHMS597348-supplement-Supporting_Information.pdf]

## General Methods

### Abbreviations

Abbreviations used for amino acids and designation of peptides follow the rules of the IUPAC-IUB Commission of Biochemical Nomenclature in J. Biol. Chem. 1972, 247, 977-983. The following additional abbreviations are used: Alloc, allyloxycarbonyl; AMBER, Asisted Model Building Energy Refinement; BCM,  $\beta$ -cell mass; Boc, tert-butyloxycarbonyl; BB, bromophenol blue; t-Bu, tert-butyl; CDI carbonyldiimidazole; CH<sub>3</sub>CN, acetonitrile; DCM, dichloromethane; Cy5, Cyanine 5 dye (for structure see **Scheme 3**); DEAD, diethyl azodicarboxylate; DI, de-ionized; DIPEA, diisopropylethylamine; DMF, N,N-dimethylformamide; DIC, diisopropylcarbodiimide; DMEM, Dulbecco's Modified Eagle Medium; DOTA, 1,4,7,10-tetraazacyclododecane-1,4,7,10-tetraacetic acid; Fmoc, fluorenylmethoxycarbonyl; FT-ICR, Fourier Transform-Ion Cyclotron Resonance; ESI-MS, Electrospray ionization-mass spectrometry; EDT, 1,2 ethanedithiol; Et<sub>2</sub>O, Diethyl ether; HCTU, O-[1-H-6-chloro-benzotriazol-1-yl](dimethylamino) ethylene] uraniumhexafluorophosphateN-oxide; HOBt, N-hydroxybenzotriazole; HOCT, 6-chloro-1-hydroxybenzotriazole; hCCK2R, human cholecystokinin 2 receptor; h $\delta$ -OR, human delta-opioid receptor; hMC4R, human Melanocortin-4 receptor; htBVL, heterobivalent ligand; MMFF, 5-HT<sub>1FR</sub>, 5-Hydroxytryptamine 1F receptor; GLP-1R, glucagon-like peptide 1 receptor; Glib, Glibenclamide; Merck Molecular Force Field; MSH, melanocyte-stimulating hormone; MALDI, Matrix Assisted Laser Desorption Ionization-Time of Flight; Pbf, 2,2,4,6,7-pentamethyl-dihydrobenzofuran-5-sulfonyl; Pego, 19-amino-5-oxo-3,10,13,16-tetraoxa-6-azanonadecan-1-oic acid; SPPS, solid-phase peptide synthesis; SD, stochastic dynamics; RP-HPLC, reverse-phase high performance liquid chromatography; SUR-1, sulfonylurea 1 receptor; TA, thioanisole; TEA, triethylamine; THF, tetrahydrofuran; TIS, triisopropylsilane; TFA, trifluoroacetic acid; Trt, triphenylmethyl (trityl).

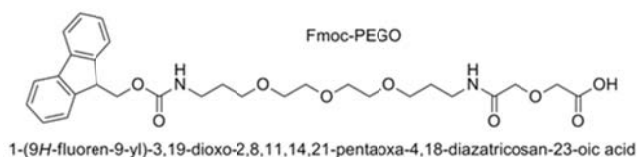

Figure S1. Structure of Fmoc-PEGO.

### Cells and Culture Conditions

$\beta$ TC3 cells were maintained under standard conditions (37°C, 5% CO<sub>2</sub>) and were grown in RPMI medium with 10% FBS and 1% Penicillin/Streptomycin.  $\beta$ TC3 from passages 20-30 in one lineage and passages from 42-52 from a second lineage were used.  $\beta$ TC3 cells express the sulfonylurea receptor at ~ 80,000 copies per cell and the GLP-1 receptor at ~ 250,000 copies/cell for a ratio of approximately 3:1 (see Figure S2 below). INS 832/3 cells were cultured under the same conditions with the addition of HEPES to the culture media.

### Estimation of Receptor Number

Using the 96 well binding assay, the number of receptors per cell was calculated by evaluating the signal at saturation, obtained by fitting the data to a one-site specific non-linear regression equation in GraphPad Prism, and comparing these values to a Europium concentration calibration curve which yielded counts per molecule of ligand, as previously described.<sup>[1]</sup> From the data presented in Figure S2, there is an estimate of 250,000 GLP-1R and 80,000 SUR1 receptors per  $\beta$ TC-3 cell.

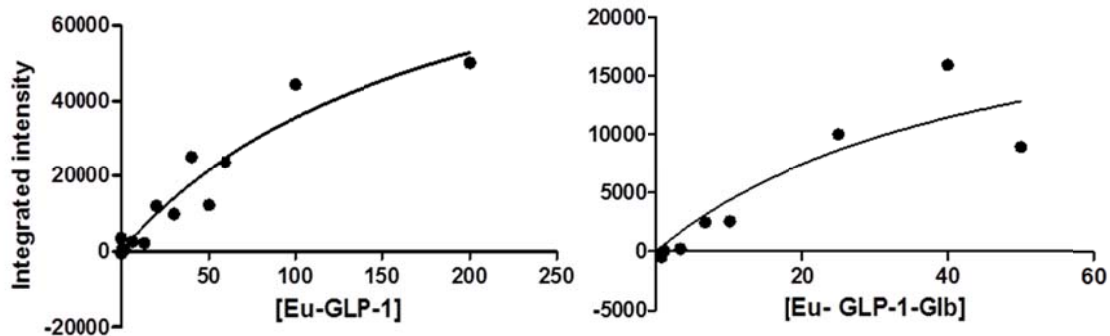

Figure S2. High throughput saturation binding analysis for estimation of receptor number. Saturation binding of Eu-GLP-1 was used to estimate the number of GLP-1R (Left). To obtain the number of SUR1 sites, the binding of the Eu-GLP-1/Glb was measured in the presence of  $1 \mu\text{M}$  GLP-1 to block binding to the GLP-1R without affecting access to the SUR1 (Right graph).  $\beta\text{TC3}$  cells were incubated in the presence of varying concentrations of Eu-labelled ligands for 1 hr, and the amount of specific binding was measured (non-specific binding was evaluated by measuring binding in the presence of  $1 \mu\text{M}$  unlabelled ligand). Ligand calibration curves were acquired simultaneously to obtain a measure of counts/mole ligand, which was then used to estimate receptors bound over the 1 hour incubation period.

### Western Immunoblot Analysis

Proteins ( $35 \mu\text{g}$ ) were separated by 8-10% SDS-PAGE along with Precision Plus Protein Standards (Bio-Rad Laboratories). The electrophoresed proteins were transferred to polyvinylidene fluoride membrane (Bio-Rad Laboratories) and blocked in 5% non-fat dry milk with Tris-buffered saline (10 mmol l<sup>-1</sup> Tris-HCl, 150 mmol l<sup>-1</sup> NaCl, pH 8) with 0.05% Tween 20 (TBST) at room temperature for 1 h. Immunoblot detection of GLP-1R and SUR1 were accomplished, respectively, with a rabbit anti-GLP-1R and goat anti-SUR1 affinity-purified polyclonal antibody (GLP-1R, ab13181, Abcam, Cambridge, MA, USA; SUR1, sc-5789, Santa Cruz Biotechnology, Inc., Santa Cruz, CA, USA) at 1:500 and 1:50 respectively in TBST containing 5% non-fat dry milk at 4°C for 16 h. The membrane was then washed 3 times for 10 min in TBST buffer. Binding of the rabbit antiserum was detected with anti-rabbit immunoglobulin G horseradish peroxidase conjugated secondary antibody (1:20,000, 170-5046; Bio-Rad Laboratories) and binding of the goat antiserum was detected with anti-goat immunoglobulin G horseradish peroxidase conjugated secondary antibody (1:20,000, sc-2020; Santa Cruz Biotechnology, Inc.) in TBST for 1 h at room temperature and detected using SuperSignal West Pico (Thermo Fisher Scientific) exposed to Kodak x-ray film.

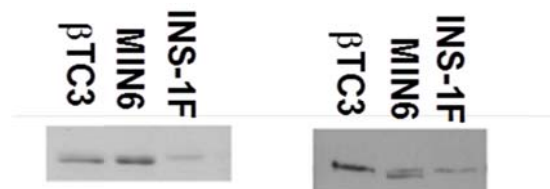

Figure S3. Western Blots for evaluation of GLP-1R and SUR1 in  $\beta$  cell lines. Protein was extracted from cells, and thirty-five micrograms of protein was separated on a 10% (GLP1R) and 8% (SUR1) SDS-PAGE gel. After transfer to PVDF membranes, proteins were immunodetected with: Left: Abcam anti-GLP-1R (ab13181) and Right: Santa Cruz anti-SUR1 (sc-5789). The GLP-1R was identified at 53 kDa, and the SUR-1 at 175 kDa.

### RNA Extraction and Quantitative Real-time PCR (qPCR)

RNA was extracted from cell lines and reverse transcribed as described previously.<sup>[2,3]</sup> Synthetic oligonucleotide primers were designed with the aid of OligoPerfect Designer software (Invitrogen Life Technologies, Carlsbad, CA, USA) and purchased from Eurofins MWG Operon (Huntsville, AL, USA; primers available upon request). The GLP-1R and SUR1 mRNA transcripts were measured by quantitative PCR using SYBR Green (Qiagen, Valencia, CA, USA) in an iQ5 Real-Time PCR Detection System (Bio-Rad Laboratories, Hercules, CA, USA). After the initial denaturation (95°C for 15 min), all reactions went through 40 cycles of 96°C (30 s), annealing temperature 60°C (30 s), and 72°C (10 s), at which point the

fluorescence intensity was measured. Melt curve analysis, starting at 60°C with an increase of 0.2°C every 6 s to 96°C, was performed at the end of the amplification to confirm product homogeneity. PCR efficiency and product concentration were determined with gene-specific plasmid DNA.

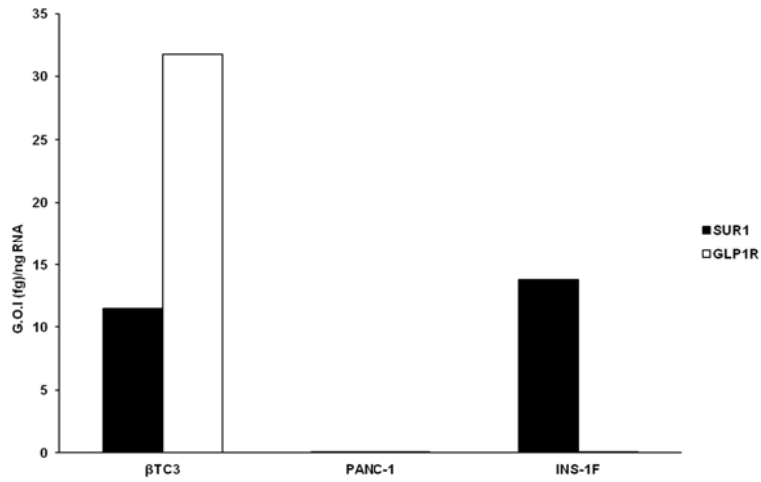

Figure S4. Cell line rt-PCR. SUR1 and GLP-1R mRNA concentrations (fmol/ng RNA) were determined by quantitative PCR in betaTC3, PANC-1 and INS-1F cell lines. Level of RNA for GLP-1R in INS-1F cells was below 1 fmol/ng RNA.

Table S1. Analytical data for multivalent ligands.

[a] MS found molecular peaks (M+X)<sup>+</sup>. [b] Peptide was eluted with a linear MeCN/0.1% CF<sub>3</sub>CO<sub>2</sub>H aqueous gradient (30% to 70% in 50 min) at a flow rate of 1.0 mL/min. [c] Peptide was eluted with a linear MeCN/0.1% TEAA aqueous gradient (10% to 90% in 30 min) at a flow rate of 0.3 mL/min. [d] Peptide was eluted with a linear MeCN/0.1% TEAA aqueous gradient (10% to 90% in 30 min) at a flow rate of 0.3 mL/min.

| Comprd | Mass Spectrum <sup>a</sup>                          |                                                                                     |             |             |           | HPLC              |
|--------|-----------------------------------------------------|-------------------------------------------------------------------------------------|-------------|-------------|-----------|-------------------|
|        | Structure                                           | Formula                                                                             | Ion         | Calculate d | Observe d |                   |
| 9      | Glp-1-Pego-[PG] <sub>3</sub> -Cys(Cγ5)-Pego-Glb     | C <sub>268</sub> H <sub>387</sub> N <sub>61</sub> O <sub>81</sub> S <sub>4</sub> Cl | (M+5)<br>5+ | 1185.546    | 1185.540  | 9.38 <sup>b</sup> |
| 10     | Glp-1-Pego-[PG] <sub>3</sub> -Lys(Eu-DTPA)-Pego-Glg | C <sub>246</sub> H <sub>371</sub> N <sub>61</sub> O <sub>81</sub> SEu               | (M+4)<br>4+ | 1425.396    | 1425.30   | 5.77 <sup>c</sup> |
| 11     | Glp-1-Pego-[PG] <sub>3</sub> -Gly-Pego-Glb          | C <sub>228</sub> H <sub>343</sub> N <sub>57</sub> O <sub>72</sub> SEu               | (M+1)<br>1+ | 5099.441    | 5099.053  | 6.10 <sup>d</sup> |
| 12     | Glp-1-Pego-(Eu-DTPA)                                | C <sub>177</sub> H <sub>271</sub> N <sub>47</sub> O <sub>60</sub> SEu               | (M+3)<br>3+ | 1390.301    | 1390.20   | 5.16 <sup>c</sup> |

[1] L. Xu, J. Vagner, J. Josan, R. M. Lynch, D. L. Morse, B. Baggett, H. Han, E. A. Mash, V. J. Hruby, R. J. Gillies, *Molecular Cancer Therapeutics* **2009**, *8*, 2356–2365.

[2] L. Cole, M. Anderson, P. B. Antin, S. W. Limesand, *The Journal of Endocrinology* **2009**, *203*, 19–31.

[3] X. Chen, P. J. Rozance, W. W. Hay, S. W. Limesand, *Experimental Biology and Medicine* **2012**, *237*, 524–529.
